# Supplementary material
Source: HighWire-hosted journal article supplement (http://jmg.bmjjournals.com/highwire/filestream/159927/field_highwire_adjunct_files/1/443e70supp2.pdf)

Patient II-1

EOG  
(2005)

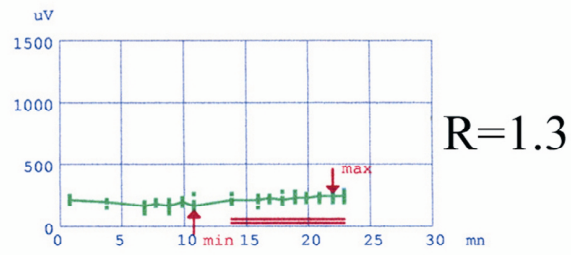

mfERG  
(2005)

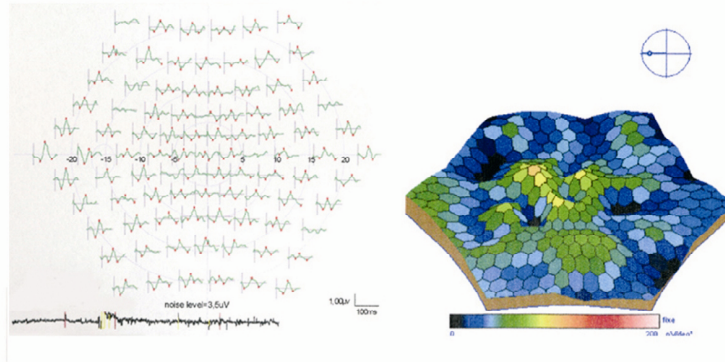

OCT  
(2005)

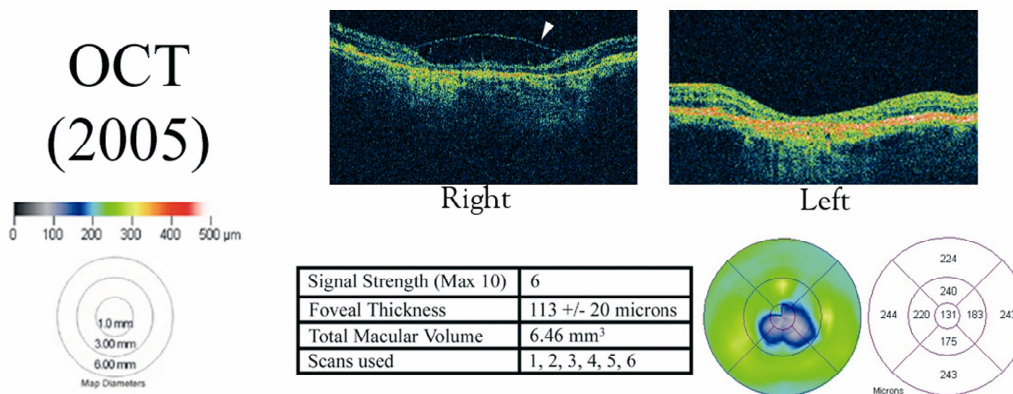

Supplement: 443e70supp2.pdf [file 443e70supp2.pdf]
